# Supplementary material for: Cerium(iii) complexes with azolyl-substituted thiophenolate ligands: synthesis, structure and red luminescence
Source: Royal Society of Chemistry journal article supplement (doi:10.1039/c9ra03199e), 2019-01-01
Supplement: c9ra03199e1.pdf [file c9ra03199e1.pdf]

## Supplementary materials

### Cerium(III) complexes with azolyl-substituted thiophenolate ligands: synthesis, structure and red luminescence

Vasily A. Ilichev,<sup>\*1</sup> Liubov I. Silantyeva,<sup>1</sup> Ivan D. Grishin,<sup>2</sup> Anton V. Rozhkov,<sup>3</sup> Roman V. Rummyantsev,<sup>1</sup> Georgy K. Fukin<sup>1</sup> and Mikhail N. Bochkarev<sup>1</sup>

<sup>1</sup> *G. A. Razuvaev Institute of Organometallic Chemistry of Russian Academy of Sciences, Tropinina st. 49, 603950 Nizhny Novgorod, Russian Federation*

<sup>2</sup> *Nizhny Novgorod State University, Gagarina avenue 23/2, 603950 Nizhny Novgorod, Russian Federation*

<sup>3</sup> *Saint Petersburg State University, Universitetskaya Emb. 7/9, 199034 St Petersburg, Russian Federation*

\*Corresponding author. E-mail: [ilichev@iomc.ras.ru](mailto:ilichev@iomc.ras.ru) (V.A.I.)

**Table 1S.** Details of crystallographic, collection and refinement data for **Ce(SSN)<sub>3</sub>(DME)**, **Ce(NSN)<sub>3</sub>(DME)**, **La(OSN)<sub>3</sub>(DME)**.

| Complex                                         | <b>Ce(SSN)<sub>3</sub>(DME)</b>                                                | <b>Ce(NSN)<sub>3</sub>(DME)</b>                                                      | <b>La(OSN)<sub>3</sub>(DME)</b>                                                |
|-------------------------------------------------|--------------------------------------------------------------------------------|--------------------------------------------------------------------------------------|--------------------------------------------------------------------------------|
| Empirical formula                               | C <sub>45</sub> H <sub>39</sub> CeN <sub>3</sub> O <sub>3</sub> S <sub>6</sub> | C <sub>48</sub> H <sub>49.50</sub> CeN <sub>6</sub> O <sub>4.50</sub> S <sub>3</sub> | C <sub>43</sub> H <sub>34</sub> LaN <sub>3</sub> O <sub>5</sub> S <sub>3</sub> |
| Formula weight                                  | 1002.27                                                                        | 1018.73                                                                              | 907.82                                                                         |
| Temperature [K]                                 | 100(2)                                                                         | 100(2)                                                                               | 100(2)                                                                         |
| Crystal system                                  | Orthorhombic                                                                   | Monoclinic                                                                           | Triclinic                                                                      |
| Space group                                     | Pbca                                                                           | I2/a                                                                                 | P-1                                                                            |
| Unit cell dimensions                            |                                                                                |                                                                                      |                                                                                |
| a[Å]                                            | 15.0364(5)                                                                     | 21.5274(3)                                                                           | 11.2387(13)                                                                    |
| b[Å]                                            | 21.7390(8)                                                                     | 12.4640(2)                                                                           | 12.7989(13)                                                                    |
| c[Å]                                            | 25.9182(9)                                                                     | 39.1836(5)                                                                           | 13.7827(12)                                                                    |
| α[°]                                            | 90                                                                             | 90                                                                                   | 88.854(8)                                                                      |
| β[°]                                            | 90                                                                             | 95.4840(10)                                                                          | 81.032(8)                                                                      |
| γ[°]                                            | 90                                                                             | 90                                                                                   | 72.201(10)                                                                     |
| Volume [Å <sup>3</sup> ]                        | 8472.0(5)                                                                      | 10465.5(3)                                                                           | 1863.8(3)                                                                      |
| Z                                               | 8                                                                              | 8                                                                                    | 2                                                                              |
| Calculated density [Mg/m <sup>3</sup> ]         | 1.572                                                                          | 1.293                                                                                | 1.618                                                                          |
| Absorption coefficient [mm <sup>-1</sup> ]      | 1.415                                                                          | 1.035                                                                                | 1.366                                                                          |
| F(000)                                          | 4064                                                                           | 4172                                                                                 | 916                                                                            |
| Crystal size [mm <sup>3</sup> ]                 | 0.35×0.15×0.13                                                                 | 0.43×0.27×0.18                                                                       | 0.15×0.10×0.03                                                                 |
| θ [°]                                           | 1.874 - 27.869                                                                 | 3.081 - 28.306                                                                       | 3.110 - 25.115                                                                 |
| Reflections collected / unique                  | 81561 / 10099                                                                  | 55315 / 12956                                                                        | 25645 / 6601                                                                   |
| R(int)                                          | 0.0671                                                                         | 0.0467                                                                               | 0.1158                                                                         |
| Final R indices [I>2σ(I)]                       | R <sub>1</sub> =0.0374,<br>wR <sub>2</sub> =0.0851                             | R <sub>1</sub> =0.0577,<br>wR <sub>2</sub> =0.1658                                   | R <sub>1</sub> =0.0515,<br>wR <sub>2</sub> =0.0969                             |
| R indices (all data)                            | R <sub>1</sub> =0.0549,<br>wR <sub>2</sub> =0.0939                             | R <sub>1</sub> =0.0770,<br>wR <sub>2</sub> =0.1826                                   | R <sub>1</sub> =0.0909,<br>wR <sub>2</sub> =0.1104                             |
| S                                               | 1.081                                                                          | 1.030                                                                                | 1.019                                                                          |
| Largest diff. peak and hole [e/Å <sup>3</sup> ] | 1.563/-0.575                                                                   | 1.886/-1.645                                                                         | 1.095/-0.859                                                                   |

**Table 2S.** The selected bond lengths (Å) and angles (°) in the **Ce(SSN)<sub>3</sub>(DME)**, **Ce(NSN)<sub>3</sub>(DME)** and **La(OSN)<sub>3</sub>(DME)** complexes.

| Bond            | Ce(SSN) <sub>3</sub> (DME),<br>Å | Bond            | Ce(NSN) <sub>3</sub> (DME),<br>Å | Bond            | La(OSN) <sub>3</sub> (DME),<br>Å |
|-----------------|----------------------------------|-----------------|----------------------------------|-----------------|----------------------------------|
| Ce(1)-S(1)      | 2.8588(8)                        | Ce(1)-S(1)      | 2.8792(12)                       | La(1)-S(1)      | 2.8679(18)                       |
| Ce(1)-S(3)      | 2.8839(8)                        | Ce(1)-S(2)      | 2.8874(12)                       | La(1)-S(2)      | 2.8666(17)                       |
| Ce(1)-S(5)      | 2.8714(8)                        | Ce(1)-S(3)      | 2.9330(11)                       | La(1)-S(3)      | 2.8598(15)                       |
| Ce(1)-N(1)      | 2.891(3)                         | Ce(1)-N(1)      | 2.729(4)                         | La(1)-N(1)      | 2.739(5)                         |
| Ce(1)-N(2)      | 2.620(2)                         | Ce(1)-N(3)      | 2.549(4)                         | La(1)-N(2)      | 2.663(5)                         |
| Ce(1)-N(3)      | 2.699(2)                         | Ce(1)-N(5)      | 2.643(3)                         | La(1)-N(3)      | 2.713(5)                         |
| Ce(1)-O(1)      | 2.568(2)                         | Ce(1)-O(1)      | 2.577(3)                         | La(1)-O(4)      | 2.630(4)                         |
| Ce(1)-O(2)      | 2.661(2)                         | Ce(1)-O(2)      | 2.649(3)                         | La(1)-O(5)      | 2.655(4)                         |
| Angle           | Ce(SSN) <sub>3</sub> (DME),<br>° | Angle           | Ce(NSN) <sub>3</sub> (DME),<br>° | Angle           | La(OSN) <sub>3</sub> (DME),<br>° |
| N(1)-Ce(1)-S(1) | 70.64(5)                         | N(1)-Ce(1)-S(1) | 70.59(9)                         | N(1)-La(1)-S(1) | 68.56(11)                        |
| N(2)-Ce(1)-S(3) | 71.15(6)                         | N(3)-Ce(1)-S(2) | 73.85(9)                         | N(2)-La(1)-S(2) | 70.03(11)                        |
| N(3)-Ce(1)-S(5) | 71.64(6)                         | N(5)-Ce(1)-S(3) | 71.69(8)                         | N(3)-La(1)-S(3) | 69.66(11)                        |

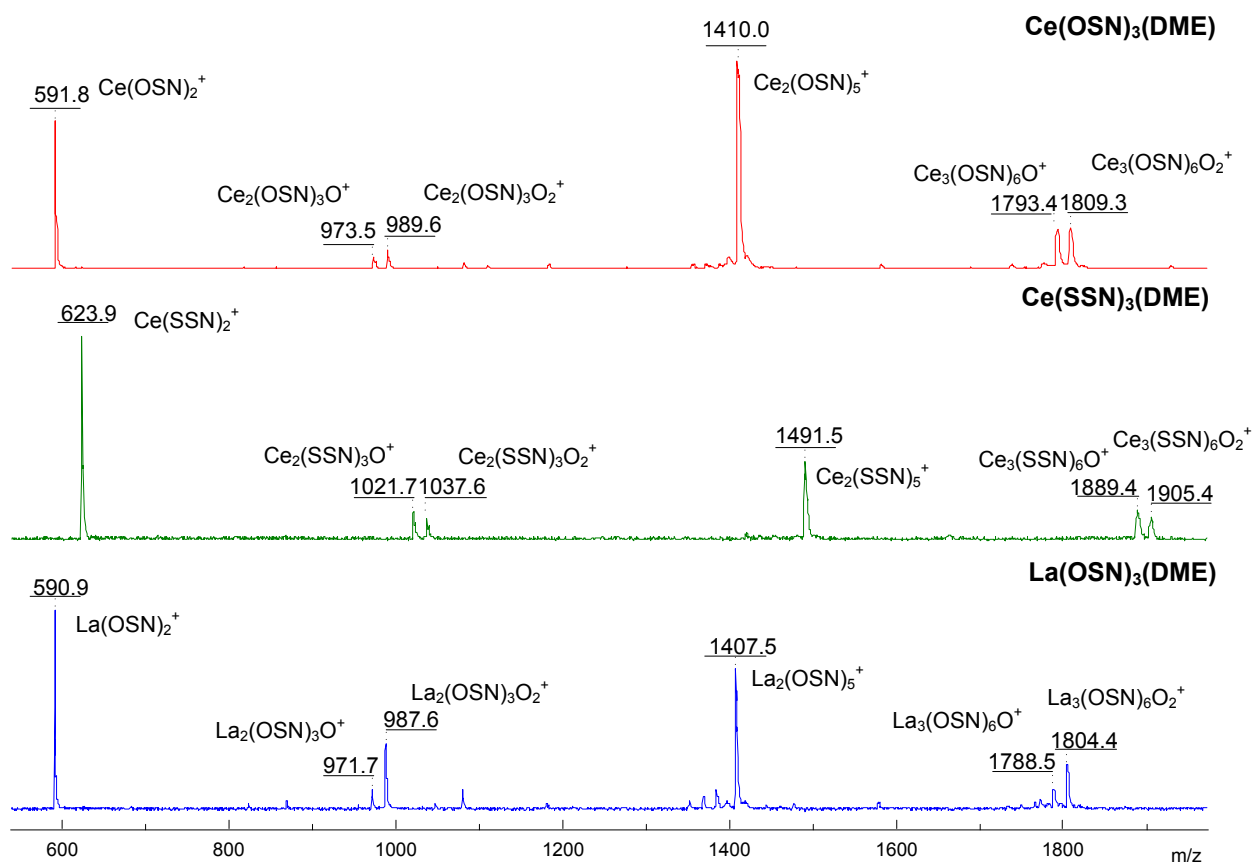

Figure 1Sa. MALDI mass spectra of complexes of **Ce(OSN)<sub>3</sub>(DME)**, **Ce(SSN)<sub>3</sub>(DME)**, **La(OSN)<sub>3</sub>(DME)** recorded in positive mode.

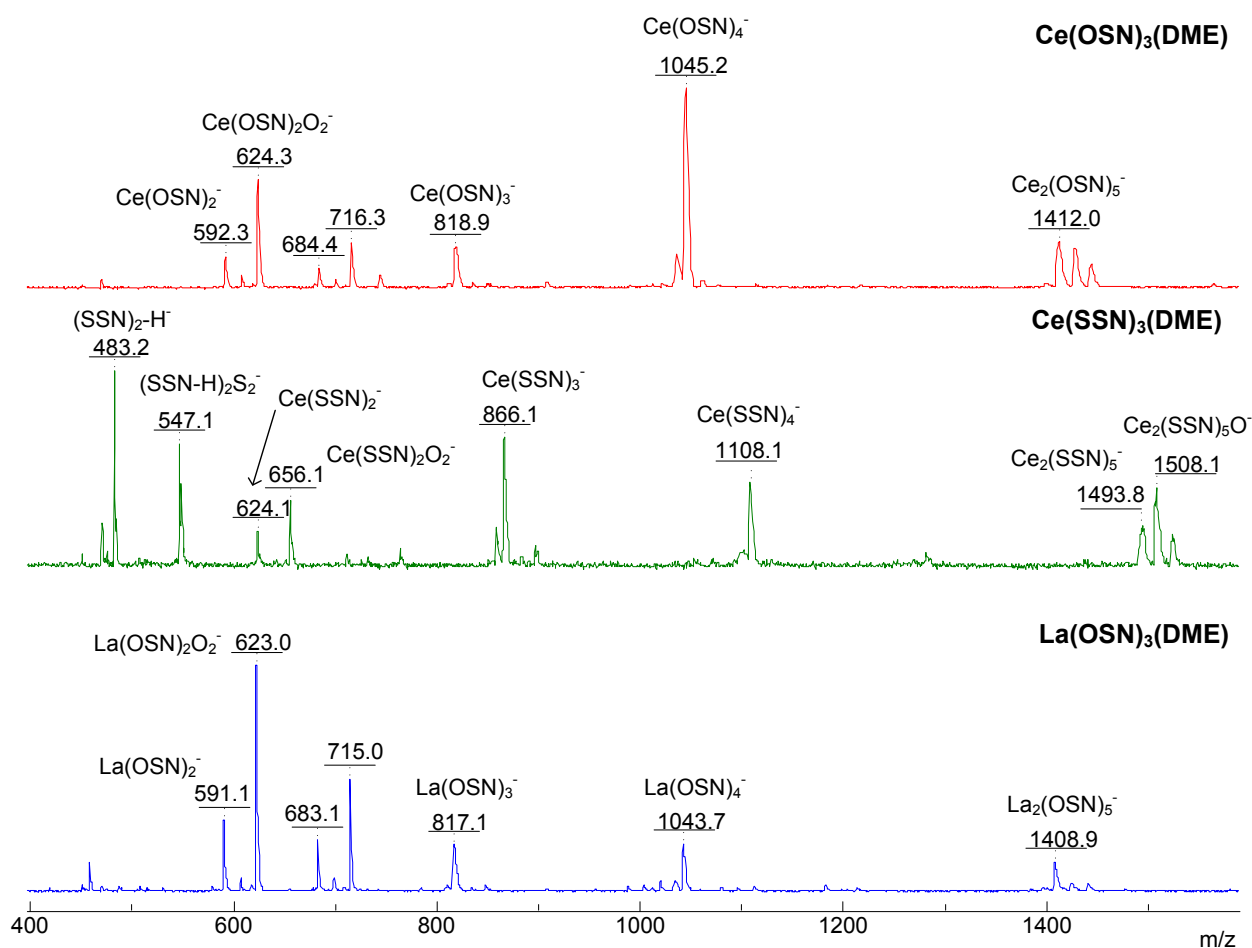

Figure 1Sb. MALDI mass spectra of complexes of **Ce(OSN)<sub>3</sub>(DME)**, **Ce(SSN)<sub>3</sub>(DME)**, **La(OSN)<sub>3</sub>(DME)** recorded in negative mode.

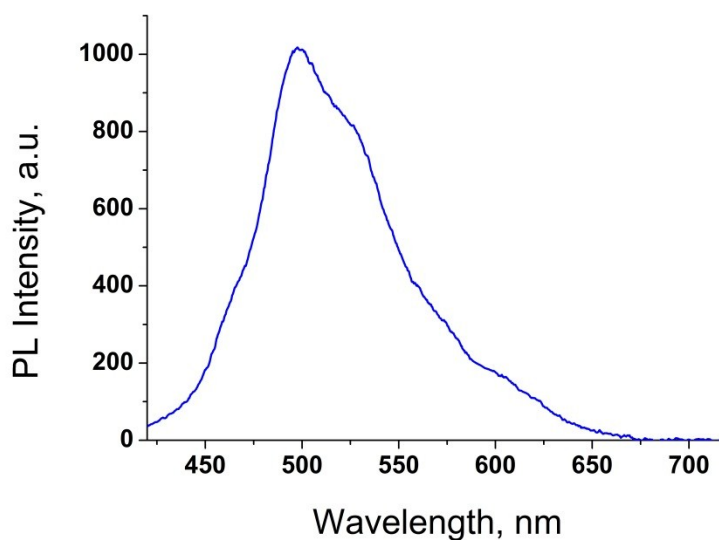

Figure 2S. PL spectrum of **La(OSN)<sub>3</sub>(DME)** in solid state. Excitation – 405 nm laser diode.

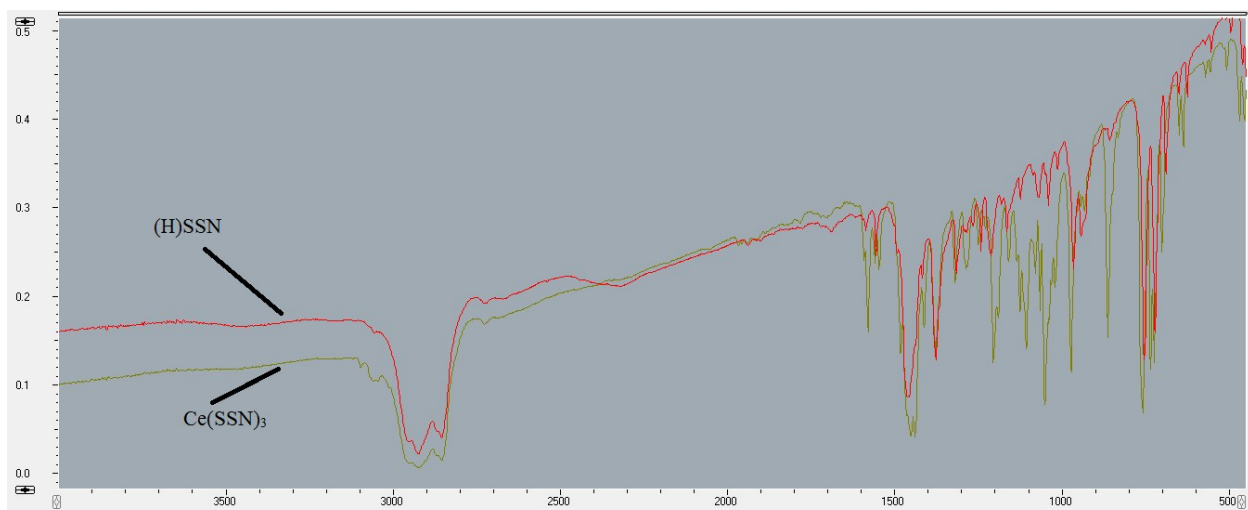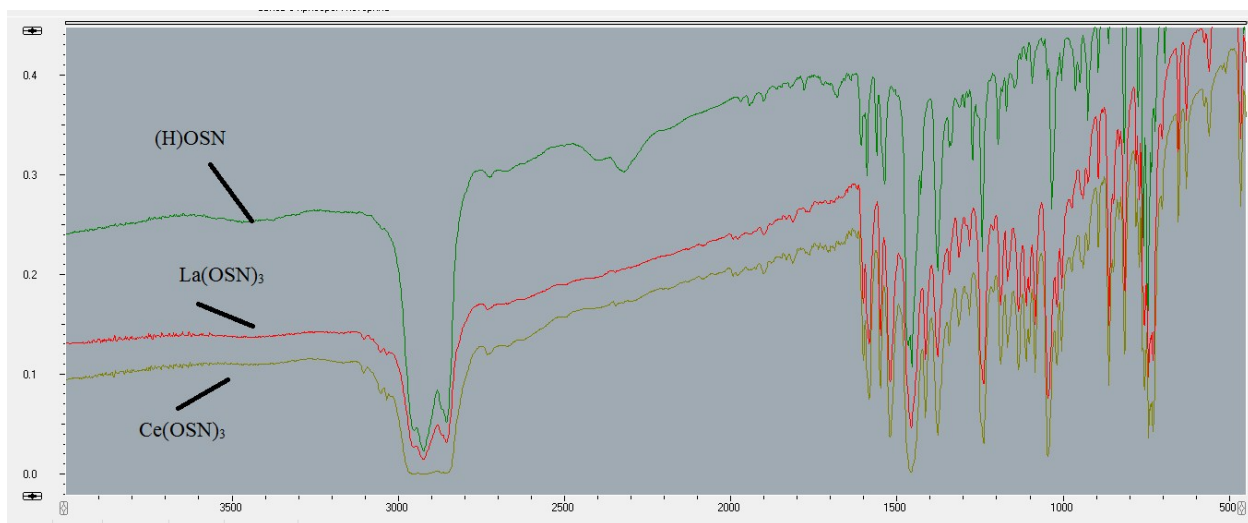

Figure 3S. IR spectra of (H)OSN, (H)SSN, La(OSN)<sub>3</sub>DME, Ce(OSN)<sub>3</sub>DME and Ce(SSN)<sub>3</sub>DME
